# Supplementary material for: ABCB1 and ABCG2 Control Brain Accumulation and Intestinal Disposition of the Novel ROS1/TRK/ALK Inhibitor Repotrectinib, While OATP1A/1B, ABCG2, and CYP3A Limit Its Oral Availability
Source: MDPI journal article supplement (doi:10.3390/pharmaceutics13111761), 2021-10-21
Supplement: s1 [file s1]

# Supplementary Materials: ABCB1 and ABCG2 Control Brain Accumulation and Intestinal Disposition of the Novel ROS1/TRK/ALK Inhibitor Repotrectinib, while OATP1A/1B, ABCG2, and CYP3A Limit Its Oral Availability

Wenlong Li, Rolf W. Sparidans, Maria C. Lebre<sup>1</sup>, Jos H. Beijnen and Alfred H. Schinkel

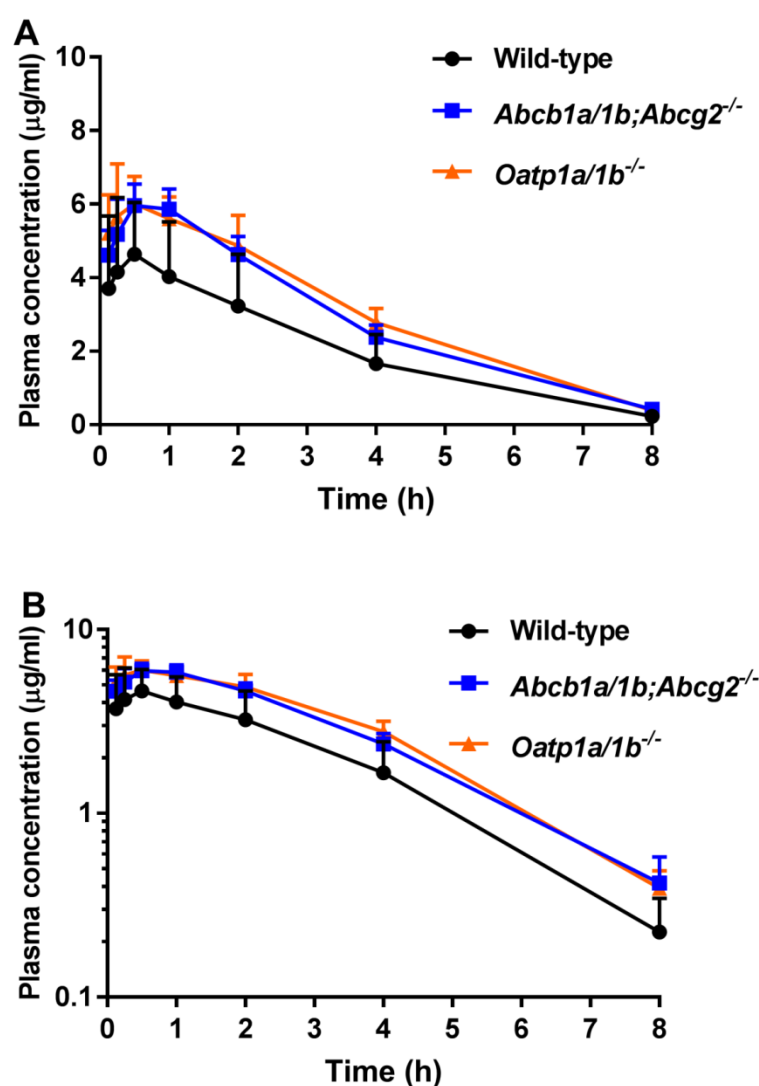

**Figure S1.** Plasma concentration-time curves (A) and semi-log plot of plasma concentration-time curves (B) of repotrectinib in female wild-type, *Abcb1a/1b;Abcg2*<sup>-/-</sup>, and *Oatp1a/1b*<sup>-/-</sup> mice over 8 h after oral administration of 10 mg/kg repotrectinib (n = 6).

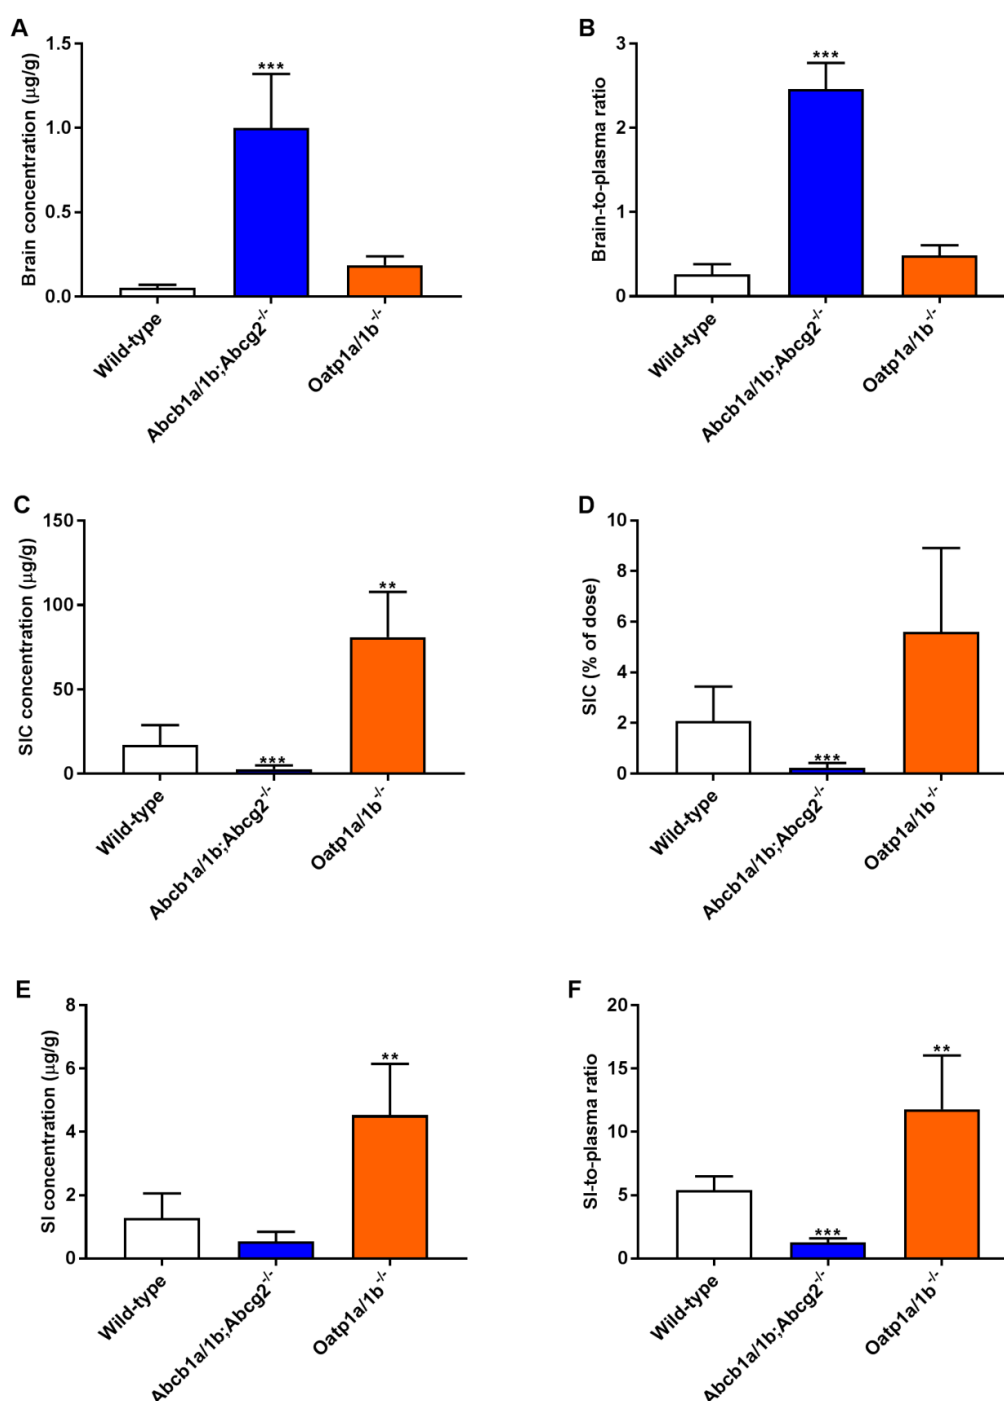

**Figure S2.** Brain, small intestinal content (SIC) and small intestinal tissue (SI) concentrations (A, C, E), and brain- and SI-to-plasma ratios (B, F), and SIC as percentage of dose (D) of repotrectinib in female wild-type, *Abcb1a/1b;Abcg2*<sup>-/-</sup>, and *Oatp1a/1b*<sup>-/-</sup> mice 8 h after oral administration of 10 mg/kg repotrectinib. SIC (% of dose), drug percentage of dose in small intestinal content expressed as total repotrectinib in SIC divided by total drug administered to the mouse. Data are presented as mean  $\pm$  S.D. (n = 6). \*,  $P < 0.05$ ; \*\*,  $P < 0.01$ ; \*\*\*,  $P < 0.001$  compared to wild-type mice.

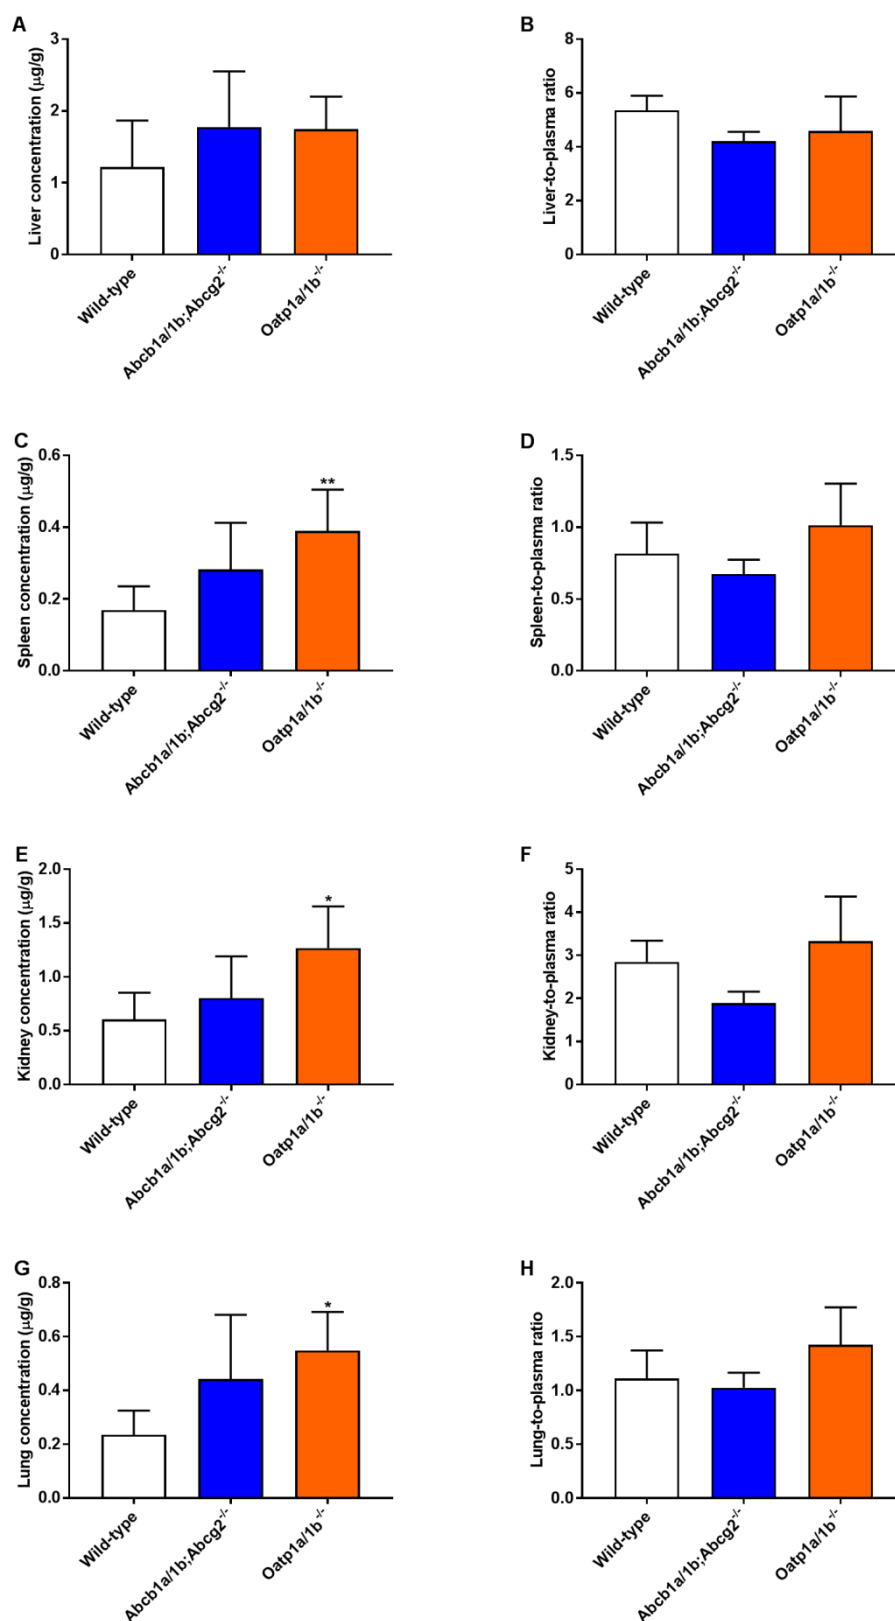

**Figure S3.** Liver, spleen, kidney and lung concentrations (A, C, E, G) and tissue-to-plasma ratios (B, D, F, H) of repotrectinib in female wild-type, *Abcb1a/1b;Abcg2*<sup>-/-</sup>, and *Oatp1a/1b*<sup>-/-</sup> mice 8 h after oral administration of 10 mg/kg repotrectinib. Data are presented as mean ± S.D. (n = 6). \*, *P* < 0.05; \*\*, *P* < 0.01; \*\*\*, *P* < 0.001 compared to wild-type mice.

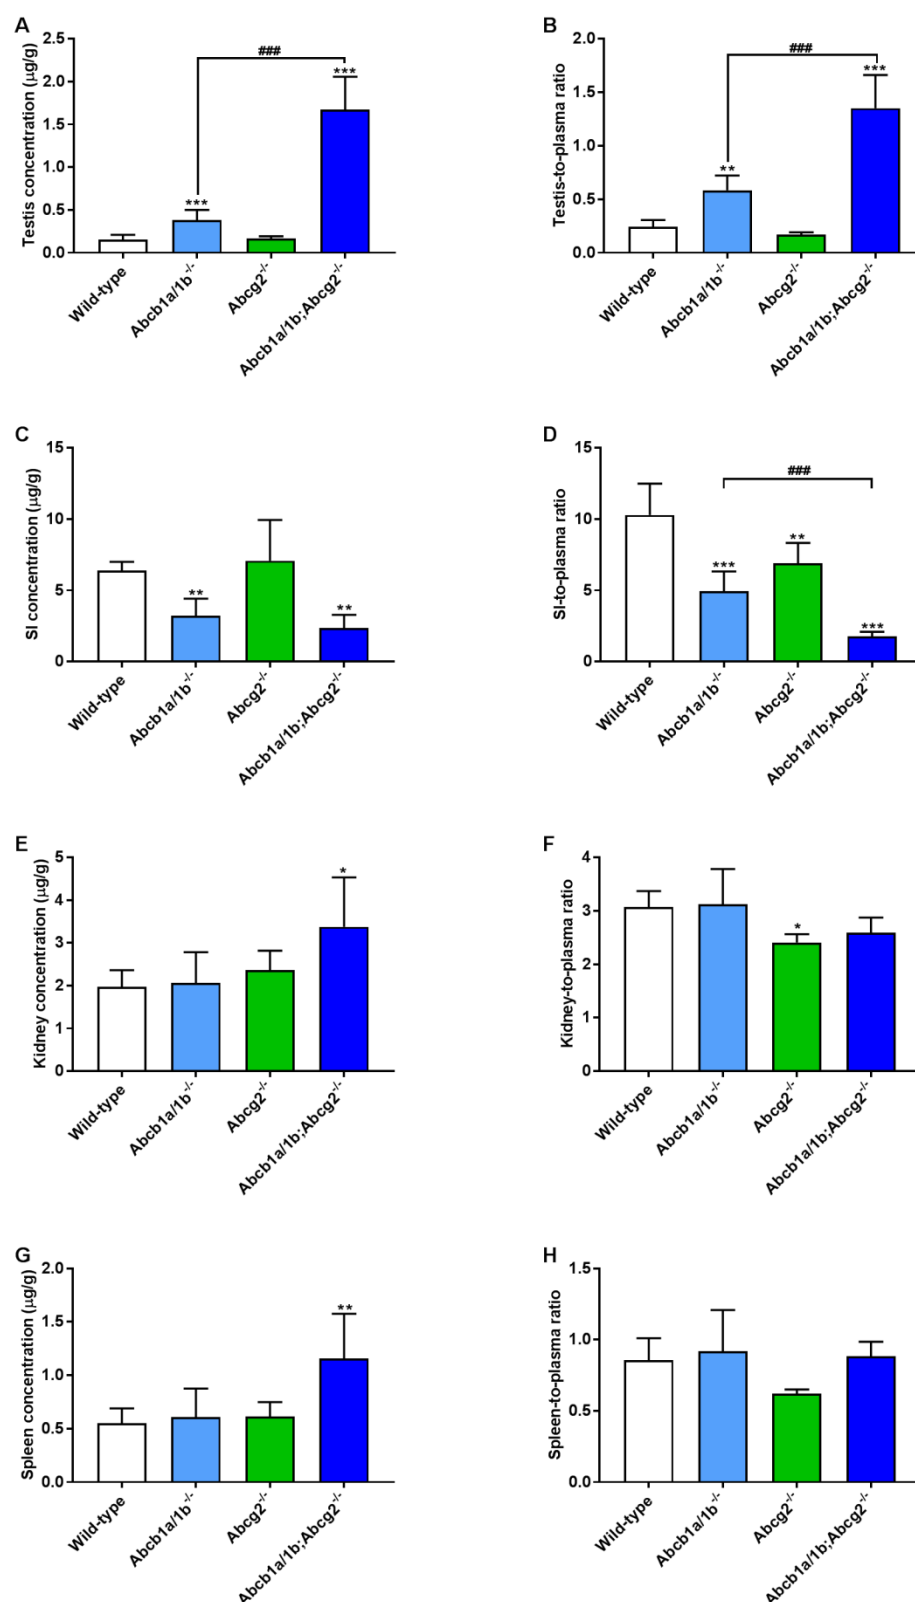

**Figure S4.** Organ concentrations (A, C, E, G) and organ-to-plasma ratios (B, D, F, H) of repotrectinib in male wild-type, *Abcb1a/1b*<sup>-/-</sup>, *Abcg2*<sup>-/-</sup>, and *Abcb1a/1b;Abcg2*<sup>-/-</sup> mice 4 h after oral administration of 10 mg/kg repotrectinib. Data are presented as mean  $\pm$  S.D. (n = 6–7). \*,  $P < 0.05$ ; \*\*,  $P < 0.01$ ; \*\*\*,  $P < 0.001$  compared to wild-type mice. #,  $P < 0.05$ ; ##,  $P < 0.01$ ; ###,  $P < 0.001$  comparing *Abcb1a/1b;Abcg2*<sup>-/-</sup> mice to *Abcb1a/1b*<sup>-/-</sup> mice.

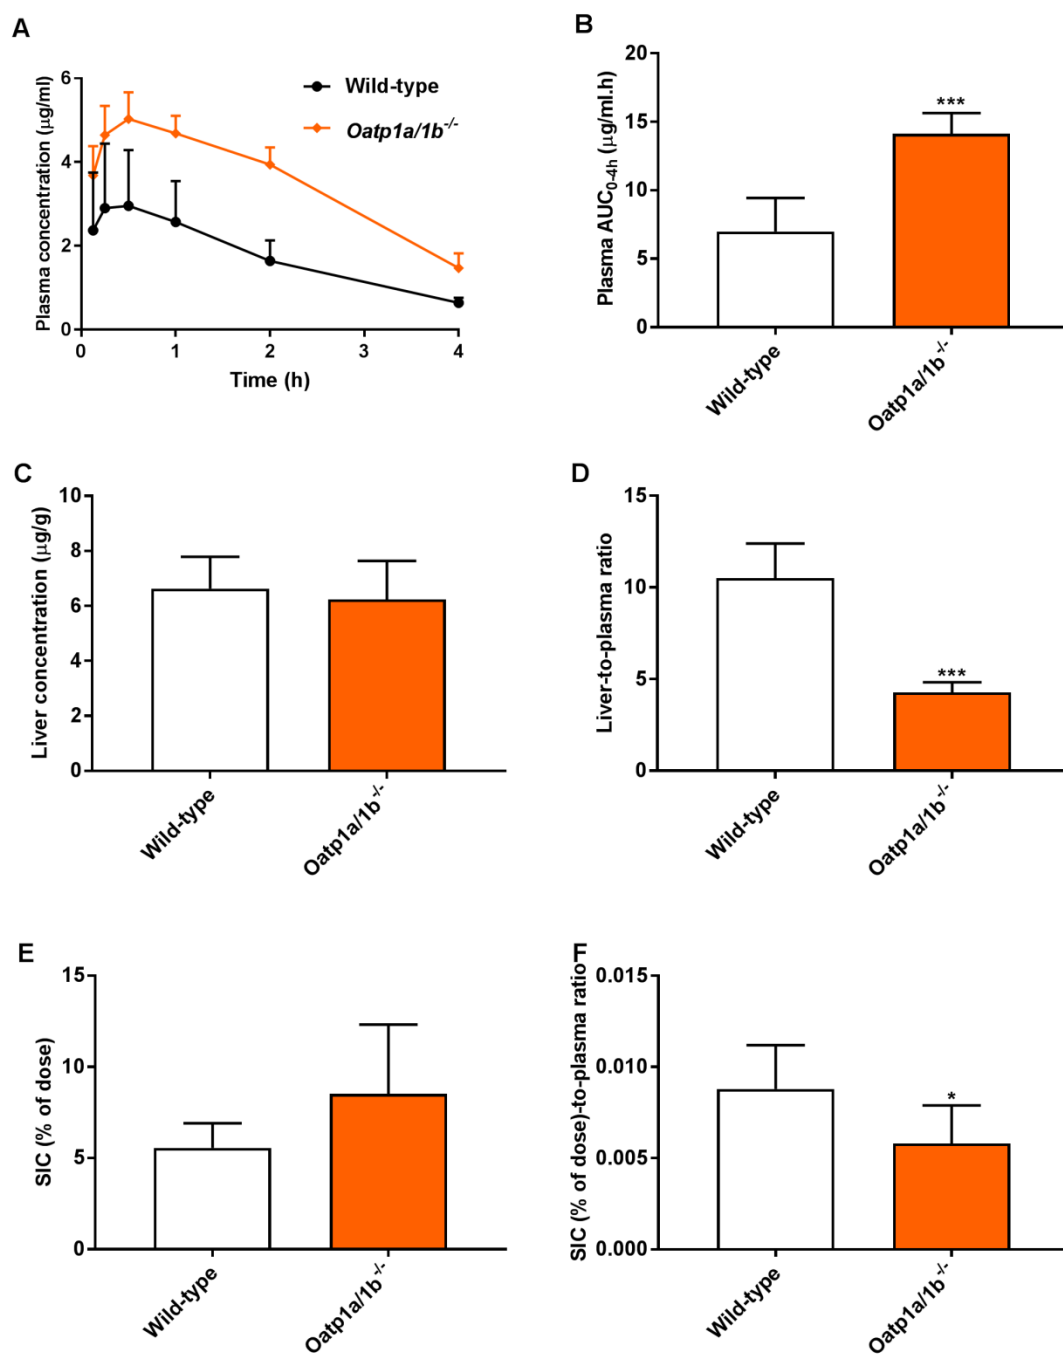

**Figure S5.** Plasma concentration-time curves (A), plasma AUC<sub>0-4h</sub> (B), liver concentrations (C), and liver-to-plasma ratios (D), SIC (% of dose) (E), and SIC (% of dose)-to-plasma ratios (F) of repotrectinib in male wild-type and *Oatp1a/1b*<sup>-/-</sup> mice 4 h after oral administration of 10 mg/kg repotrectinib. Data are presented as mean ± S.D. (n = 6-7). \*,  $P < 0.05$ ; \*\*,  $P < 0.01$ ; \*\*\*,  $P < 0.001$  compared to wild-type mice.

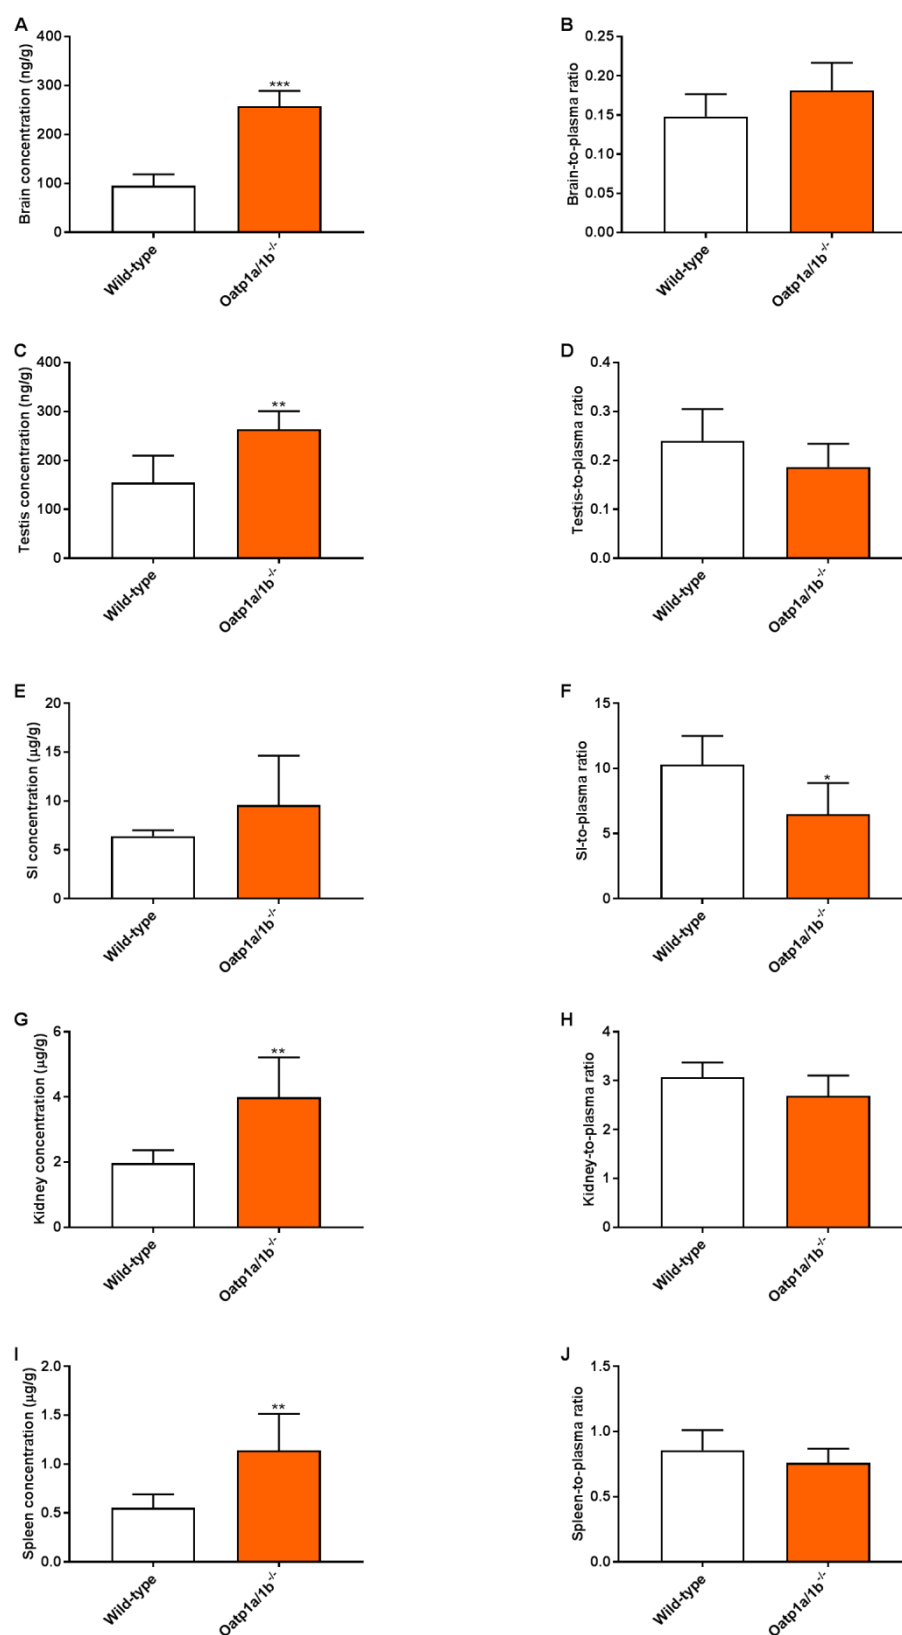

**Figure S6.** Organ concentrations (A, C, E, G, I) and tissue-to-plasma ratios (B, D, F, H, J) of repotrectinib in male wild-type and *Oatp1a/1b*<sup>-/-</sup> mice 4 h after oral administration of 10 mg/kg repotrectinib. Data are presented as mean ± S.D. (n = 6-7). \*, *P* < 0.05; \*\*, *P* < 0.01; \*\*\*, *P* < 0.001 compared to wild-type mice.

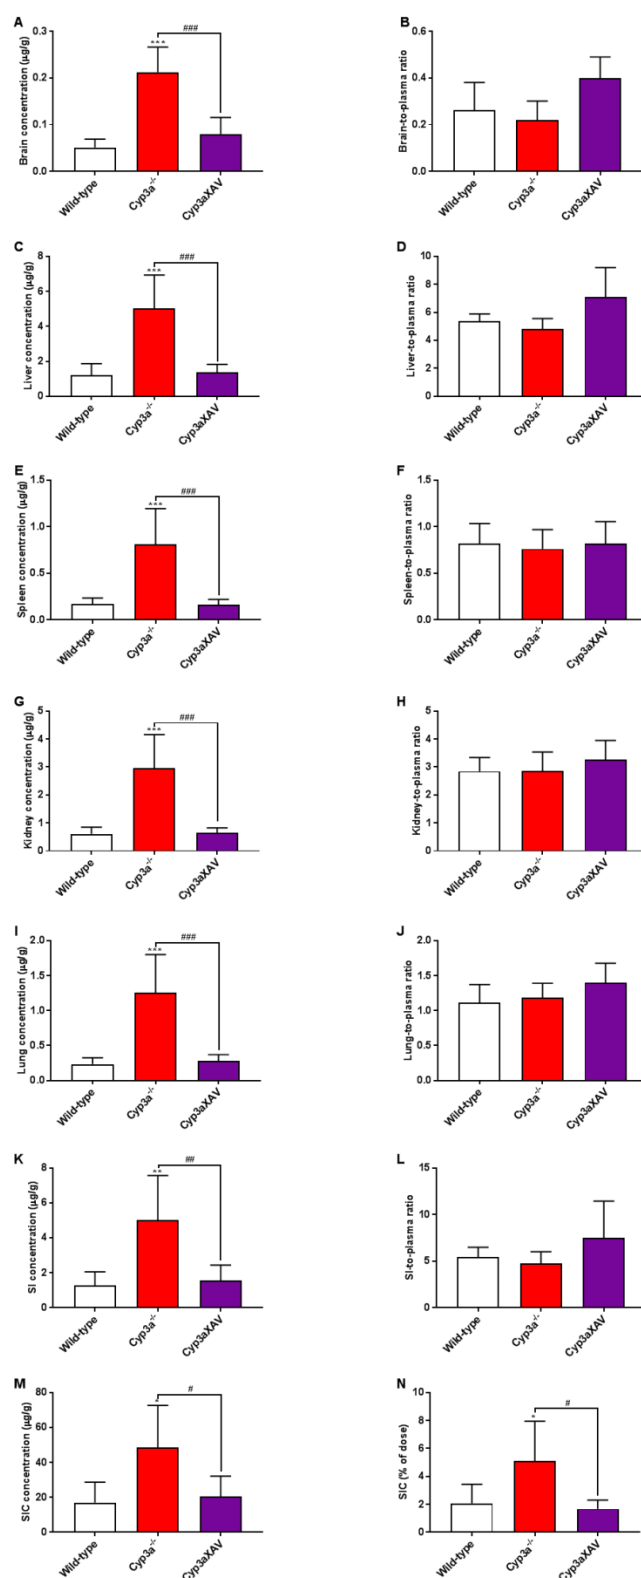

**Figure S7.** Organ concentrations (A, C, E, G, I, K), organ-to-plasma ratios (B, D, F, H, J, L), small intestinal content (SIC) concentrations (M), and SIC (% of dose) (N) of repotrectinib in female wild-type, *Cyp3a*<sup>-/-</sup>, and *Cyp3aXAV* mice 8 h after oral administration of 10 mg/kg repotrectinib. Data are presented as mean ± S.D. (n = 6). \*,  $P < 0.05$ ; \*\*,  $P < 0.01$ ; \*\*\*,  $P < 0.001$  compared to wild-type mice. #,  $P < 0.05$ ; ##,  $P < 0.01$ ; ###,  $P < 0.001$  comparing *Cyp3aXAV* to *Cyp3a*<sup>-/-</sup> mice.

**Table S1.** Plasma, brain, liver, and small intestine pharmacokinetic parameters of repotrectinib in female wild-type, *Abcb1a/1b;Abcg2*<sup>-/-</sup>, and *Oatp1a/1b*<sup>-/-</sup> mice over 8 h after oral administration of 10 mg/kg repotrectinib.

| Parameter                                        | Genotype     |                                       |                                 |
|--------------------------------------------------|--------------|---------------------------------------|---------------------------------|
|                                                  | Wild-type    | <i>Abcb1a/1b;Abcg2</i> <sup>-/-</sup> | <i>Oatp1a/1b</i> <sup>-/-</sup> |
| AUC <sub>0-8h</sub> , µg/ml·h                    | 16.28 ± 6.35 | 23.10 ± 2.11*                         | 24.60 ± 3.27*                   |
| Fold change AUC <sub>0-8h</sub>                  | 1.00         | 1.42                                  | 1.51                            |
| C <sub>max</sub> , µg/ml                         | 4.80 ± 1.78  | 6.19 ± 0.44                           | 6.15 ± 0.80                     |
| T <sub>max</sub> , h                             | 0.5 (0.25-1) | 0.5 (0.5-1)                           | 0.5 (0.25-1)                    |
| C <sub>brain</sub> , ng/g                        | 51.2 ± 17.8  | 1000 ± 320.4***                       | 186.2 ± 51.4                    |
| Fold increase C <sub>brain</sub>                 | 1.00         | 19.5                                  | 3.64                            |
| Brain-to-plasma ratio                            | 0.26 ± 0.12  | 2.46 ± 0.31***                        | 0.48 ± 0.12                     |
| Fold increase ratio                              | 1.00         | 9.46                                  | 1.85                            |
| C <sub>liver</sub> , µg/ml                       | 1.22 ± 0.65  | 1.78 ± 0.77                           | 1.75 ± 0.45                     |
| Fold increase C <sub>liver</sub>                 | 1.00         | 1.50                                  | 1.43                            |
| Liver-to-plasma ratio                            | 5.36 ± 0.54  | 4.21 ± 0.35                           | 4.59 ± 1.28                     |
| Fold increase ratio                              | 1.00         | 0.79                                  | 0.86                            |
| SIC (% of dose)                                  | 2.08 ± 1.35  | 0.22 ± 0.20***                        | 5.59 ± 3.32                     |
| Fold change                                      | 1.00         | 0.11                                  | 2.69                            |
| SIC (% of dose)-to-plasma ratio·10 <sup>-3</sup> | 8.87 ± 1.83  | 0.48 ± 0.43***                        | 14.5 ± 8.9                      |
| Fold change                                      | 1.00         | 0.054                                 | 1.63                            |

Data are given as mean ± S.D. (n = 6). AUC<sub>0-8h</sub>, area under the plasma concentration-time curve; C<sub>max</sub>, maximum concentration in plasma; T<sub>max</sub>, median time point of maximum plasma concentration; C<sub>brain</sub>, brain concentration; SIC, small intestinal content. SIC (% of dose), drug percentage of dose in small intestinal content expressed as total repotrectinib in SIC divided by total drug administered to the mouse. \*, *P* < 0.05; \*\*, *P* < 0.01; \*\*\*, *P* < 0.001 compared to wild-type mice.

**Table S2.** Plasma, brain, liver, and small intestine pharmacokinetic parameters of repotrectinib in male wild-type and *Oatp1a/1b*<sup>-/-</sup> mice over 4 h after oral administration of 10 mg/kg repotrectinib.

| Parameter                                  | Genotype     |                                 |
|--------------------------------------------|--------------|---------------------------------|
|                                            | Wild-type    | <i>Oatp1a/1b</i> <sup>-/-</sup> |
| AUC <sub>0-4h</sub> , µg/ml·h              | 6.99 ± 2.46  | 14.12 ± 1.53***                 |
| Fold increase AUC <sub>0-4h</sub>          | 1.00         | 2.02                            |
| C <sub>max</sub> , µg/ml                   | 3.08 ± 1.44  | 5.07 ± 0.59***                  |
| T <sub>max</sub> , h                       | 0.5 (0.25-1) | 0.5 (0.25-1)                    |
| C <sub>brain</sub> , ng/g                  | 95.1 ± 23.5  | 258 ± 31***                     |
| Fold increase C <sub>brain</sub>           | 1.00         | 2.71                            |
| Brain-to-plasma ratio                      | 0.15 ± 0.03  | 0.18 ± 0.04                     |
| Fold change ratio                          | 1.00         | 1.20                            |
| C <sub>testis</sub> , ng/g                 | 155 ± 55     | 264 ± 37**                      |
| Fold increase C <sub>testis</sub>          | 1.00         | 1.70                            |
| Testis-to-plasma ratio                     | 0.24 ± 0.07  | 0.19 ± 0.05                     |
| Fold change ratio                          | 1.00         | 0.79                            |
| C <sub>liver</sub> , µg/g                  | 6.63 ± 1.16  | 6.24 ± 1.40                     |
| Fold change C <sub>liver</sub>             | 1.00         | 0.94                            |
| Liver-to-plasma ratio                      | 10.5 ± 1.9   | 4.3 ± 0.5***                    |
| Fold change ratio                          | 1.00         | 0.41                            |
| SIC (% of dose)                            | 5.56 ± 1.34  | 8.52 ± 3.80                     |
| Fold change SIC (% of dose)                | 1.00         | 1.53                            |
| SIC (%) -to-plasma ratio *10 <sup>-3</sup> | 8.79 ± 2.41  | 5.81 ± 2.09*                    |
| Fold change ratio                          | 1.00         | 0.66                            |

Data are presented as mean ± S.D. (n = 6-7). AUC<sub>0-4h</sub>, area under the plasma concentration-time curve; C<sub>max</sub>, maximum concentration in plasma; T<sub>max</sub>, median time point of maximum plasma concentration (range for individual mice); C<sub>brain/liver/SIC</sub>, brain/liver/SIC concentration. SIC (% of dose), drug as percentage of dose present in small intestinal content (SIC), which was expressed as total repotrectinib in SIC divided by total drug administered to mouse. \*, *P* < 0.05; \*\*, *P* < 0.01; \*\*\*, *P* < 0.001 compared to wild-type mice.
